# Supplementary material for: Metagenomic insights into microbial adaptation to the salinity gradient of a typical short residence-time estuary
Source: PubMed Central journal article supplement (PMC11200988; doi:10.1186/s40168-024-01817-w), 2024-06-25

- High-salinity sample
- Intermediate-salinity sample
- Low-salinity sample

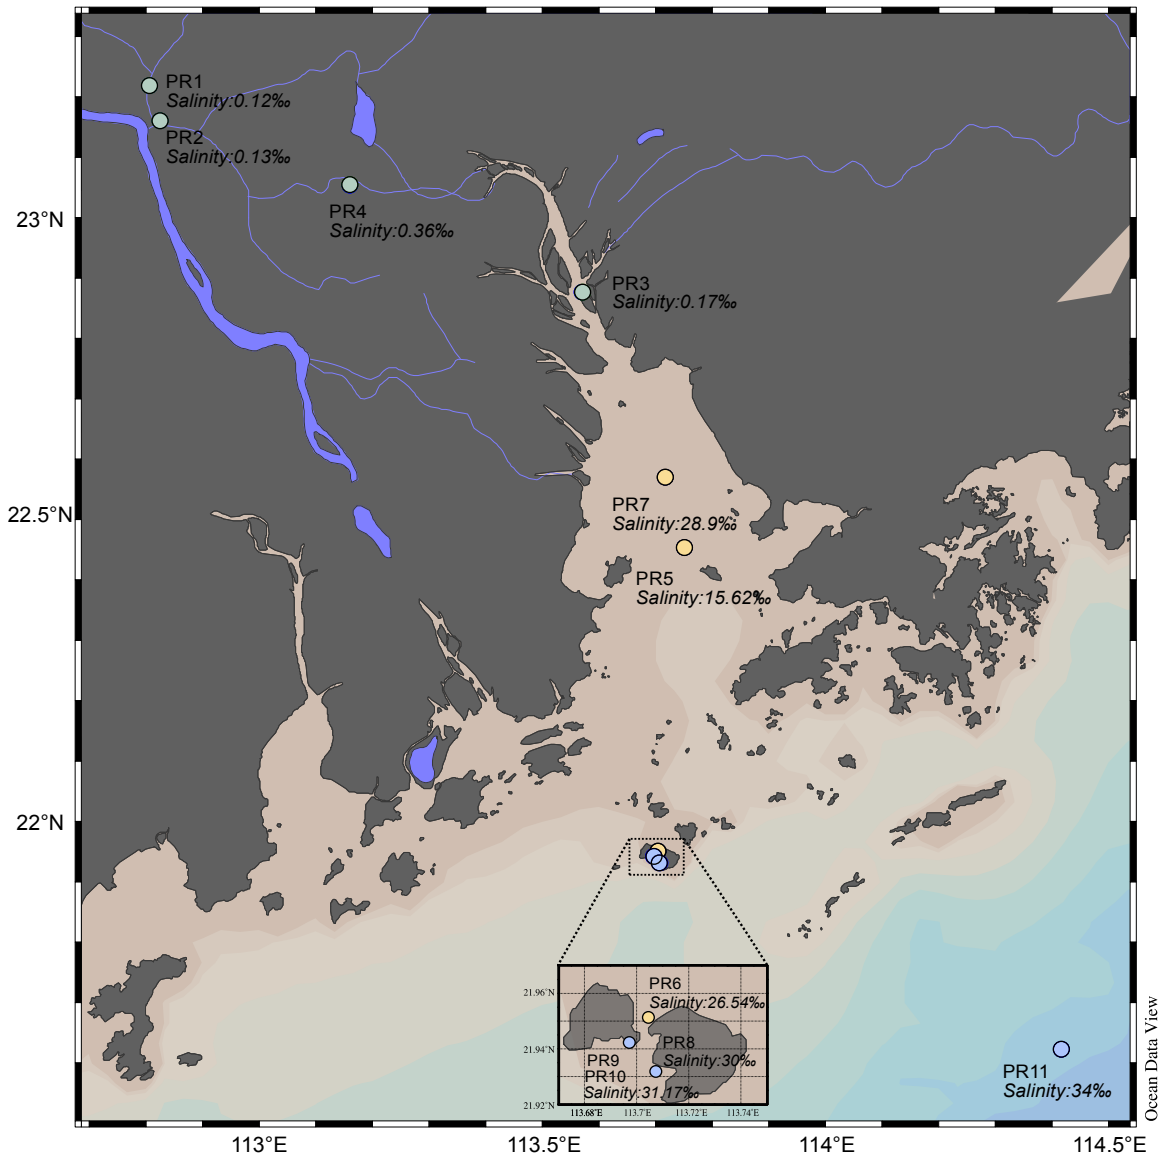

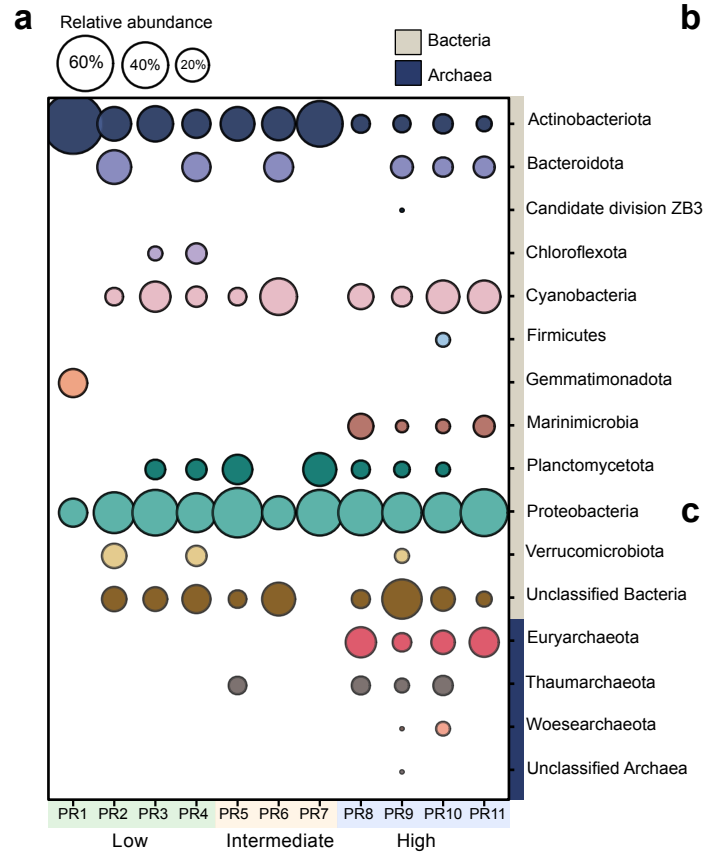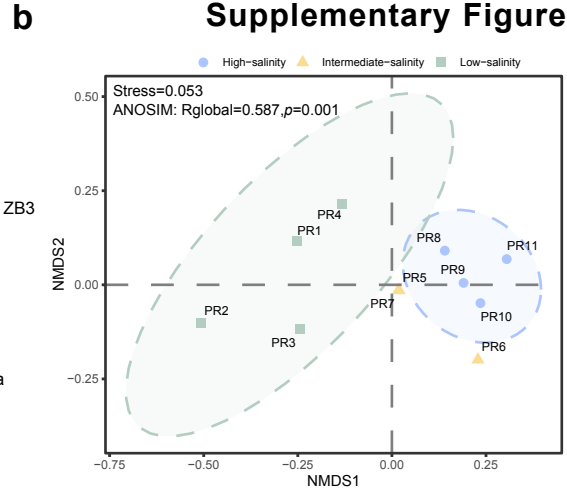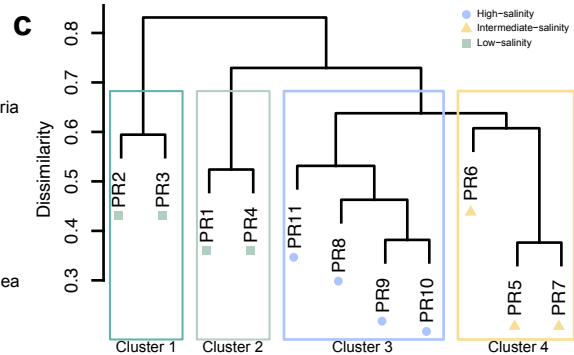

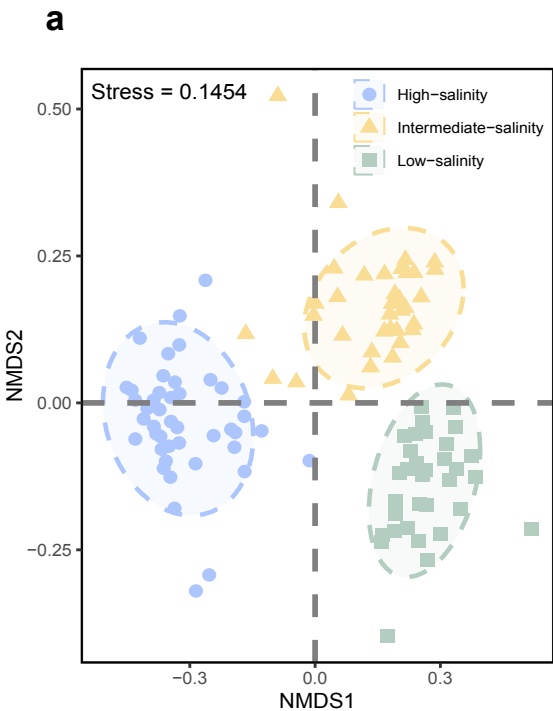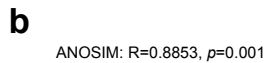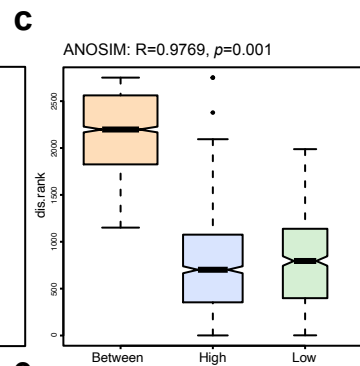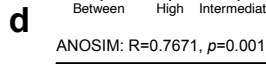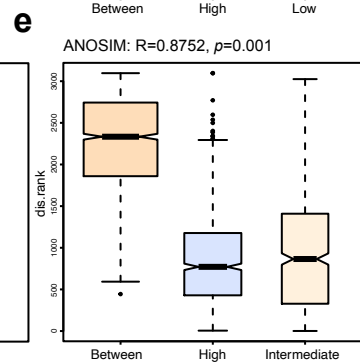

# Supplementary Figure S4

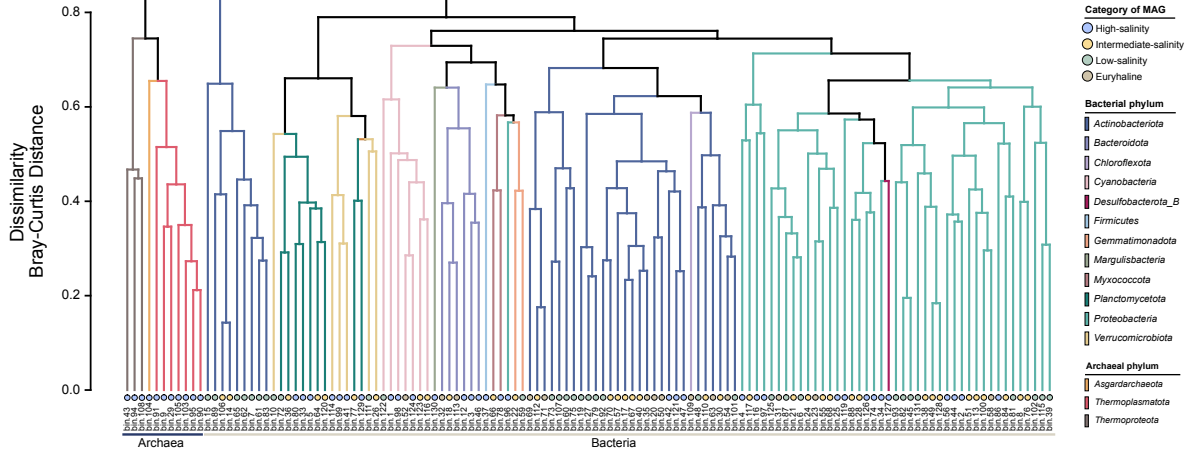

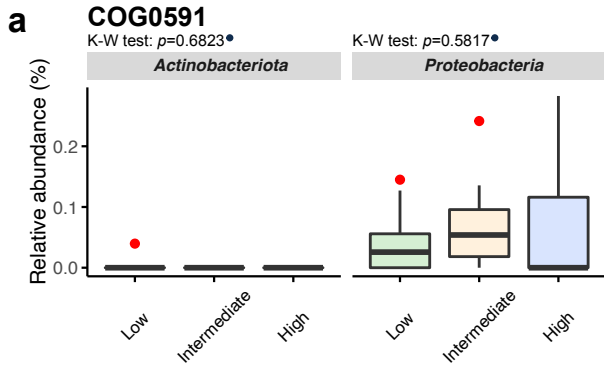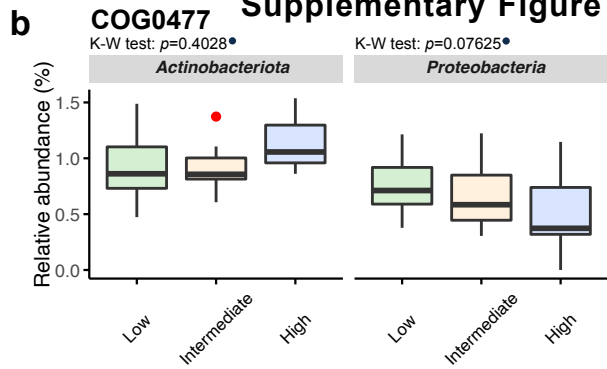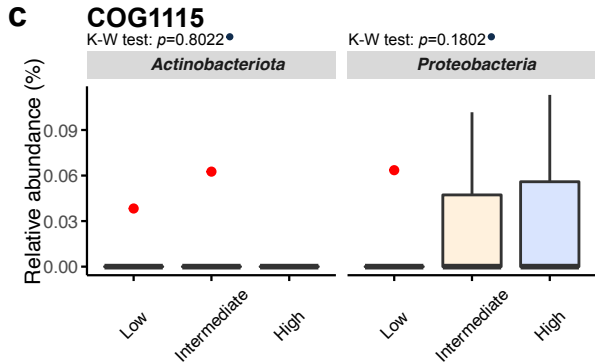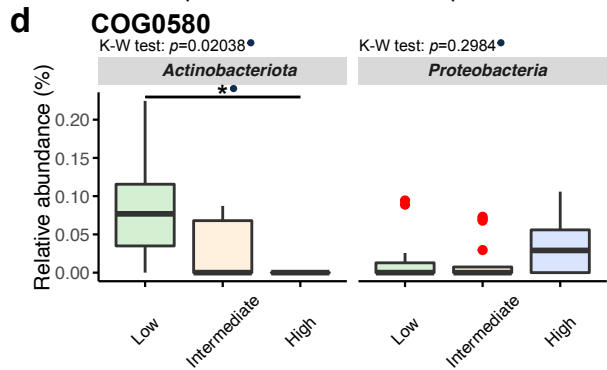

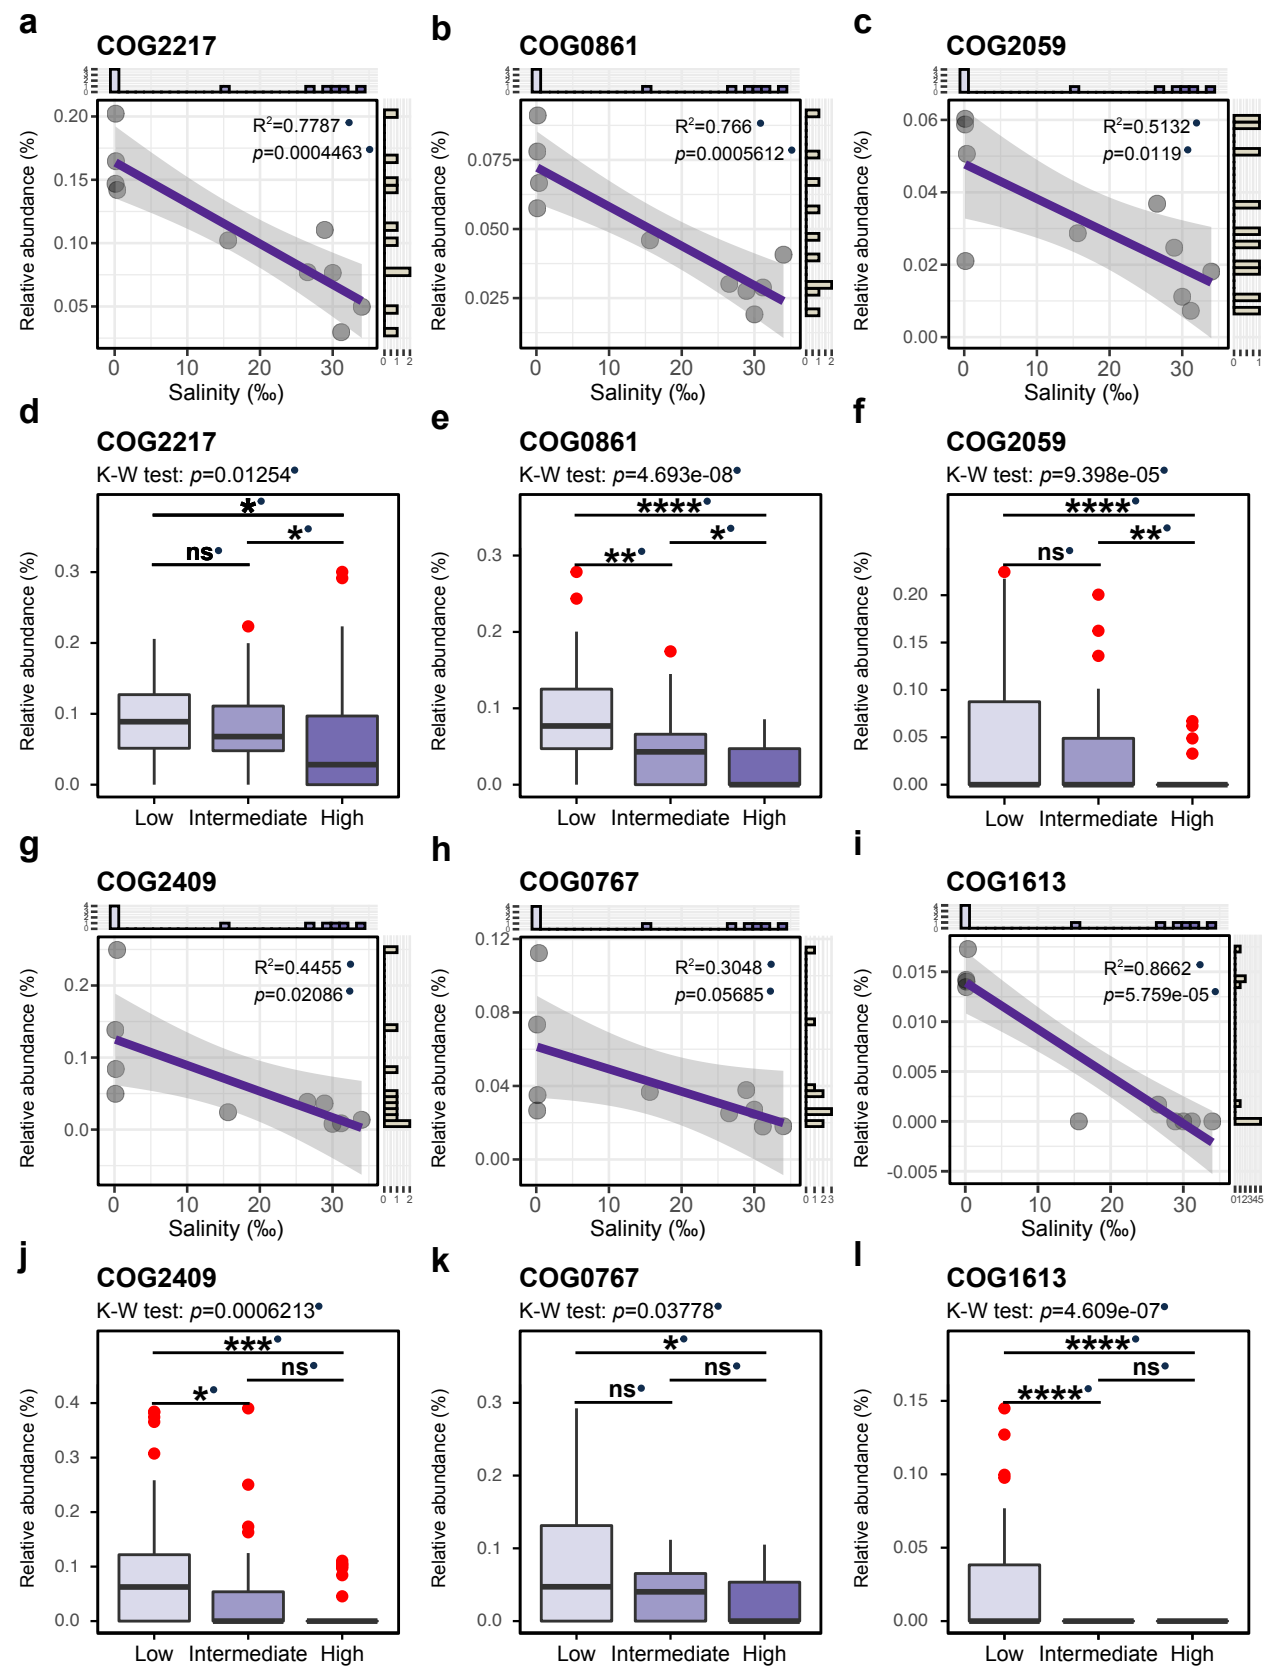

Supplement: 40168_2024_1817_MOESM1_ESM.pdf [file 40168_2024_1817_MOESM1_ESM.pdf]
